# Supplementary material for: A case report of a novel compound heterozygous mutation in a Brazilian patient with deficiency of Interleukin-1 receptor antagonist (DIRA)
Source: Springer Nature journal article supplement (doi:10.1186/s12969-020-00454-5), 2020-08-20
Supplement: MOESM1 [file 18302032]

## Appendix 1 - Forward and Reverse primers used in exons 2 and 3 of the IL1RN gene

| GENE                          | PRIMER F 5'->3'      | PRIMER R 5'->3'      |
|-------------------------------|----------------------|----------------------|
| IL1RN EXON 2<br>(NM_173842.2) | CCTGGAAGAGCTGGATGCAA | AAGTGACGTGATGCCACAT  |
| IL1RN EXON 3<br>(NM_173842.2) | TAACCTGACCCTCCCCTCTG | AGCTTCCAAAGTGACCCCAG |
